# Supplementary material for: Lichen Secondary Metabolites in Flavocetraria cucullata Exhibit Anti-Cancer Effects on Human Cancer Cells through the Induction of Apoptosis and Suppression of Tumorigenic Potentials
Source: PubMed Central journal article supplement (PMC4216107; doi:10.1371/journal.pone.0111575), 2014-10-31
Supplement: pone.0111575.s001.pdf [file pone.0111575.s001.pdf]

# Supplementary Material

Figure S1.

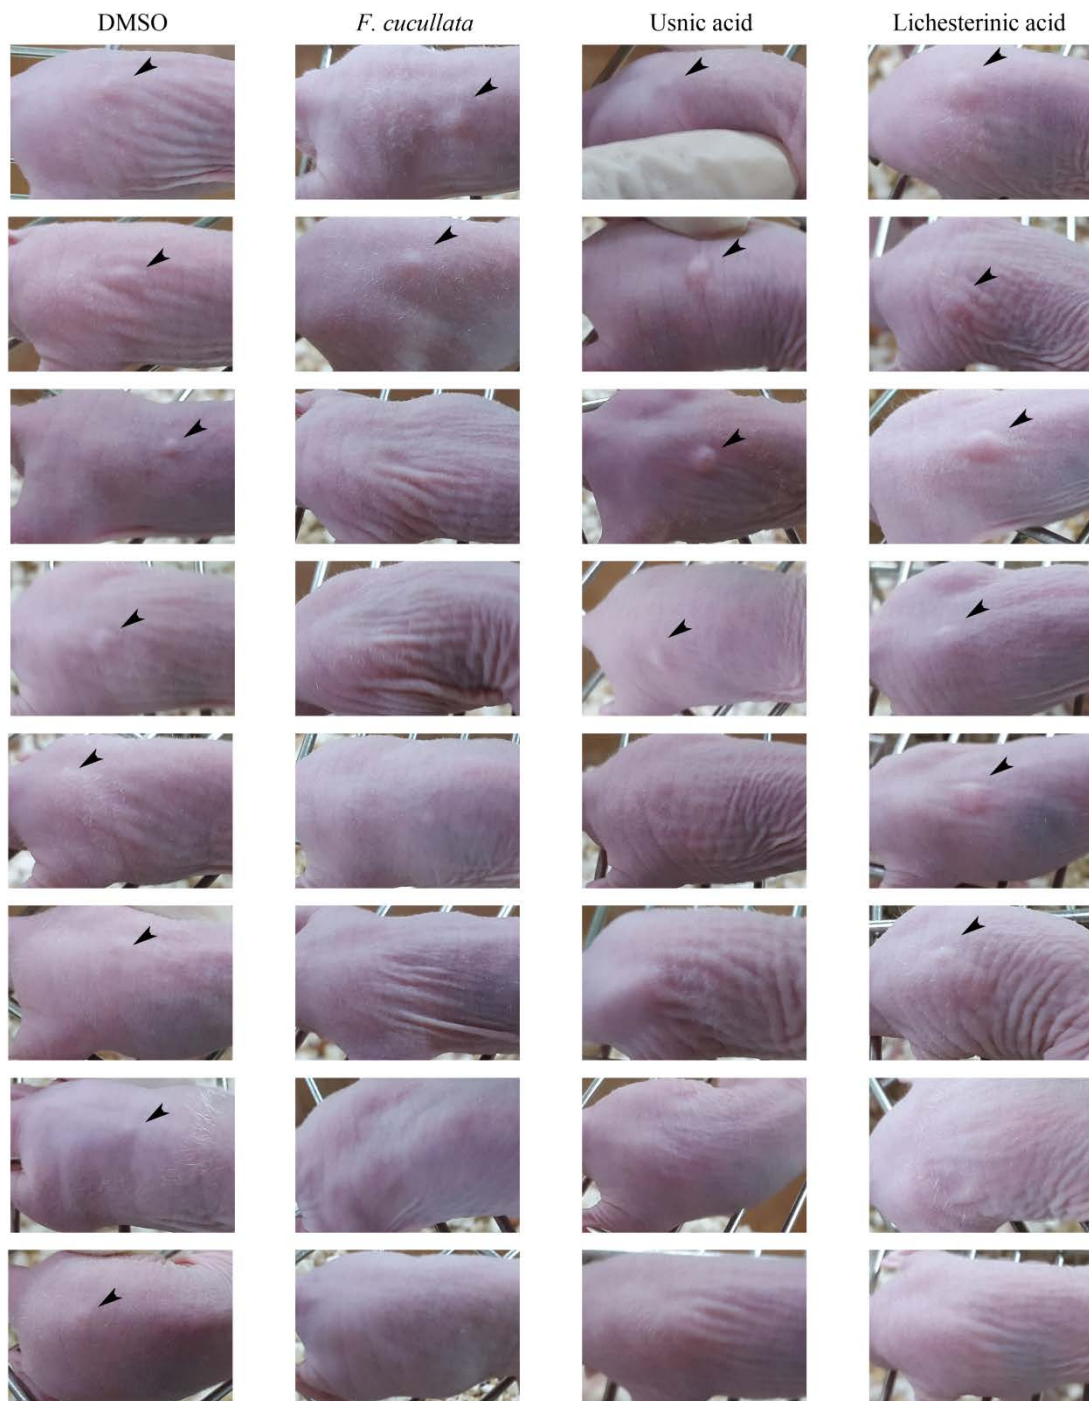

**Table S1.**

| No. collection | Name of lichen species                                 | Main compounds based on TLC analysis results                                                      | IC <sub>50</sub> of acetone extract after 2 days (µg/ml) |       |
|----------------|--------------------------------------------------------|---------------------------------------------------------------------------------------------------|----------------------------------------------------------|-------|
|                |                                                        |                                                                                                   | HT29                                                     | AGS   |
| RO11002        | <i>Thamnolia vermicularis</i> (SW) Schaer              | Decarboxythamnolic<br>Thamnolic acid                                                              | 71.045                                                   | 87.56 |
| RO11025        | <i>Alectoriassa mentosa</i> (Ach) Ach.                 | Alectoronic acid<br>Usnic acid                                                                    | 44.3                                                     | 30.55 |
| RO11045        | <i>Flavocetraria nivalis</i> (L.) Karnefelt & A. Thell | Ergosterol<br>Usnic acid<br>Freidelin                                                             | 39.02                                                    | 17.9  |
| RO11069        | <i>Stereocaulon alpinum</i> Laurer                     | Norstictic acid<br>Lobaric acid<br>Atranorin                                                      | 46.98                                                    | 53.8  |
| RO11073        | <i>Cladonia mitis</i> Sandst                           | Fumarprotocetraric acid<br>Norrangiformic acid<br>Rangiformic acid<br>Psoromic acid<br>Usnic acid | 31.63                                                    | 42.7  |
| RO11078        | <i>Cetraria islandica</i> (L.) Ach                     | Fumarprotocetraric acid<br>Alloprotolichesterinic acid                                            | 73.37                                                    | 110.7 |

|                |                                                       |                            |        |       |
|----------------|-------------------------------------------------------|----------------------------|--------|-------|
|                |                                                       | Protolichesterinic acid    |        |       |
|                |                                                       | Lichesterinic acid         |        |       |
|                |                                                       | Freidelin                  |        |       |
|                |                                                       | Physodic acid              |        |       |
| <b>RO11079</b> | <i>Pseudevernia furfuracea</i> (L.)<br>Zopf           | Chloroatranorin            | 47.14  | 40.3  |
|                |                                                       | Atranorin                  |        |       |
| <b>RO11084</b> | <i>Alectoria nigricans</i> (Ach) Nyl                  | Alectorialic acid          | 34.2   | 28.95 |
|                |                                                       | Salazinic acid             |        |       |
| <b>RO11111</b> | <i>Bryoria capillaris</i> (Ach.)<br>Brodo & D. Hawksw | Psoromic acid              | 91.16  | 41.5  |
|                |                                                       | Barbatolic acid            |        |       |
|                |                                                       | Atranorin                  |        |       |
|                |                                                       | Physodalic acid            |        |       |
| <b>RO11166</b> | <i>Hypogymnia physodes</i> (L.)<br>Nyl                | Physodic acid              | 74.21  | 40.1  |
|                |                                                       | Atranorin                  |        |       |
|                |                                                       | Chloroatranorin            |        |       |
|                |                                                       | Salazinic acid             |        |       |
| <b>RO11176</b> | <i>Usnea florida</i> (L.) weber ex<br>F.H. Wigg       | Thamnolic acid             | 53.4   | 65.2  |
|                |                                                       | Usnic acid                 |        |       |
|                |                                                       | Barbatic acid              |        |       |
| <b>RO11182</b> | <i>Platismatia glauca</i> (L.) W.<br>Culb. & C. Culb. | Caperatic acid             | 99.537 | 70.7  |
|                |                                                       | Atranorin                  |        |       |
| <b>RO11193</b> | <i>Peltigera venosa</i> (L.) Hoffm                    | Tenuiorin                  | 49.06  | 36.5  |
| <b>RO11207</b> | <i>Cladonia macrophylla</i><br>(Schaer.) Stenh        | Psoromic acid              | N.D.   | N.D.  |
| <b>RO11208</b> | <i>Cetraria ericetorum</i> Opiz                       | Fumarprotocetraric<br>acid | 39.16  | 27.8  |

|                |                                                                    |                             |        |      |
|----------------|--------------------------------------------------------------------|-----------------------------|--------|------|
|                |                                                                    | Alloprotolichesterinic acid |        |      |
|                |                                                                    | Protolichesterinic acid     |        |      |
|                |                                                                    | Lichesterinic acid          |        |      |
|                |                                                                    | Freidelin                   |        |      |
| <b>RO11209</b> | <i>Evernia divaricata (L.) Ach</i>                                 | Usnic acid                  | 44.65  | 32.4 |
|                |                                                                    | Divaricatic acid            |        |      |
| <b>RO11210</b> | <i>Flavocetraria cucullata (Bellardi) Karnefelt &amp; A. Thell</i> | Protolichesterinic acid     | 18.924 | 11.6 |
|                |                                                                    | Usnic acid                  |        |      |

N.D. indicates that no cytotoxicity was found on cancer cell lines at a drug concentration of 100 µg/mL.

**Table S2.**

| <b>Peak no.</b> | <b>Retention time (min)</b> | <b>% Intensity</b> | <b>Molecular formula</b>                        | <b>Compounds</b>          |
|-----------------|-----------------------------|--------------------|-------------------------------------------------|---------------------------|
| 1               | 2.268                       | 2.30 ± 0.1         | C <sub>18</sub> H <sub>12</sub> O <sub>10</sub> | Salazinic acid            |
| 2               | 2.855                       | 1.06 ± 0.05        | C <sub>19</sub> H <sub>18</sub> O <sub>9</sub>  | Squamatic acid            |
| 3               | 4.646                       | 1.1 ± 0.05         | C <sub>19</sub> H <sub>18</sub> O <sub>8</sub>  | Baeomycesic acid          |
| 4               | 11.327                      | 91.49 ± 0.0025     | C <sub>18</sub> H <sub>16</sub> O <sub>7</sub>  | Usnic acid                |
| 5               | 22.315                      | 2.27 ± 0.1         | C <sub>19</sub> H <sub>32</sub> O <sub>4</sub>  | d-protolichesterinic acid |
| 6               | 26.595                      | 2.22 ± 0.1         | C <sub>19</sub> H <sub>32</sub> O <sub>4</sub>  | Lichesterinic acid        |

**Table S3.**

| Cell lines                                                                        | MDCK             | RIE             | NIH 3T3         | HaCaT           | HEK293T          | HT29            | AGS              | A549             | CWR22Rv-1       |
|-----------------------------------------------------------------------------------|------------------|-----------------|-----------------|-----------------|------------------|-----------------|------------------|------------------|-----------------|
| Acetone extract ( $\mu\text{g/ml}$ )                                              | 124.14 $\pm$ 2.5 | 66.5 $\pm$ 3.75 | 84.7 $\pm$ 2.5  | 87.9 $\pm$ 1.8  | 21.82 $\pm$ 0.98 | 18.9 $\pm$ 0.25 | 11.6 $\pm$ 0.4   | 16.65 $\pm$ 0.35 | 32.2 $\pm$ 0.75 |
| usnic acid concentration at $\text{IC}_{50}$ in acetone extract ( $\mu\text{M}$ ) | 328.1            | 175.8           | 225.06          | 233.6           | 57.6             | 49.9            | 30.7             | 44.01            | 85.1            |
| Usnic acid ( $\mu\text{M}$ )                                                      | 133.04 $\pm$ 3.5 | 126 $\pm$ 4.25  | 164.2 $\pm$ 3.7 | 185.7 $\pm$ 4.8 | 85.3 $\pm$ 0.75  | 95.2 $\pm$ 0.85 | 15.01 $\pm$ 0.52 | 65.3 $\pm$ 0.65  | 24.1 $\pm$ 0.63 |
| Lichesterinic acid ( $\mu\text{M}$ )                                              | N.D.             | N.D.            | N.D.            | N.D.            | N.D.             | 587 $\pm$ 1.7   | 385.9 $\pm$ 1.8  | N.D.             | 1015 $\pm$ 4.5  |

N.D. indicates no cytotoxicity was found on cancer cell lines at 100  $\mu\text{g/mL}$ . Data are presented as means  $\pm$  standard deviation of three independent experiments.

MDCK, Madin-Darby canine kidney; RIE, rat intestinal epithelial; HEK, human embryonic kidney; HT29, human colon cancer cell line; AGS, human gastric cancer cell line; A549, human lung cancer cell line; and CWR22Rv-1, human prostate cancer cell line.
